# Supplementary material for: A dominant function of CCaMK in intracellular accommodation of bacterial and fungal endosymbionts
Source: PubMed Central journal article supplement (PMC2916219; doi:10.1111/j.1365-313x.2010.04228.x), 2010-05-11

Figure S1

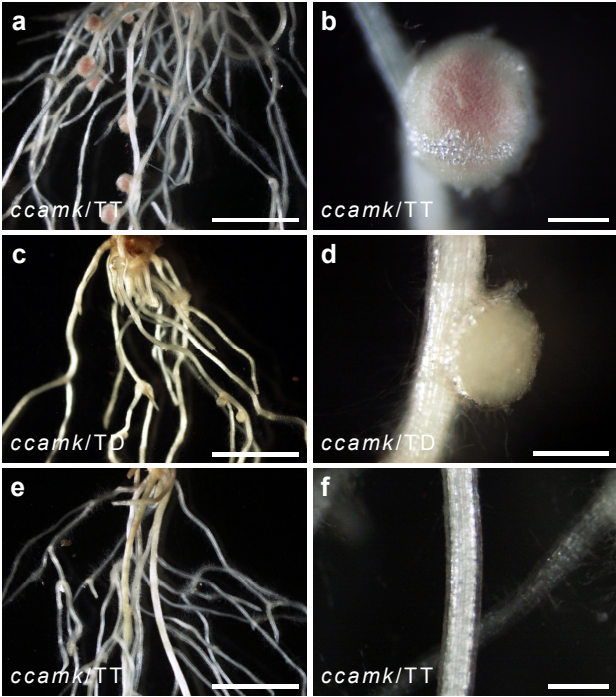

Figure S2

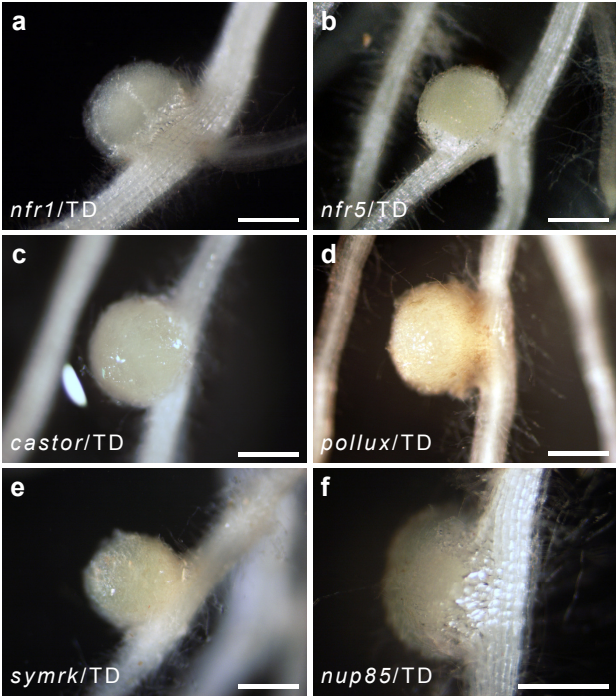

Figure S3

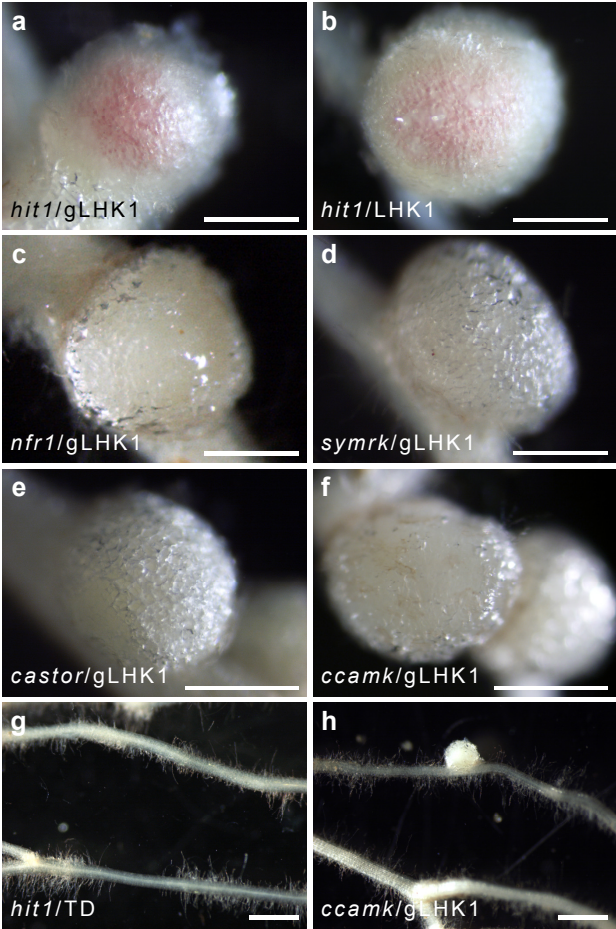

Figure S4

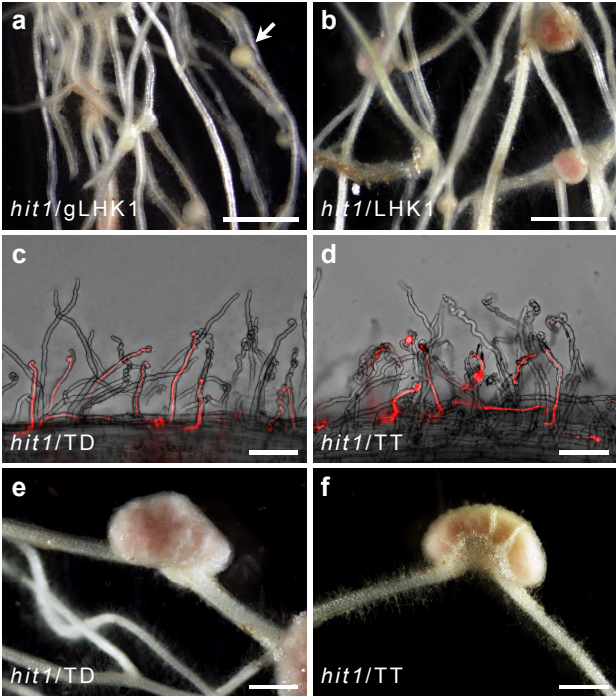

Supplement: tpj0063-0141-SD2.pdf [file tpj0063-0141-SD2.pdf]
